# Supplementary material
Source: HighWire-hosted journal article supplement (https://bmjopen.bmj.com/content/10/4/e034697)
Supplement: inline-supplementary-material-2 [file inline-supplementary-material-2.pdf]

Supplementary Table 2. Mean difference in physical activity variables between women with fibromyalgia with a reproductive work only (n=143) and those with a reproductive + productive work (n=115)

|                 | Light Intensity |                  |                 |                  |                  |                  | Moderate Intensity |                 |                |                |                |                | Vigorous Intensity |          |        |                |                |                |
|-----------------|-----------------|------------------|-----------------|------------------|------------------|------------------|--------------------|-----------------|----------------|----------------|----------------|----------------|--------------------|----------|--------|----------------|----------------|----------------|
|                 | Mean difference | 95 % CI          |                 | P <sub>1</sub>   | P <sub>2</sub>   | P <sub>3</sub>   | Mean difference    | 95 % CI         |                | P <sub>1</sub> | P <sub>2</sub> | P <sub>3</sub> | Mean difference    | 95 % CI  |        | P <sub>1</sub> | P <sub>2</sub> | P <sub>3</sub> |
| Leisure-time PA | 4.875           | -30.458          | 40.208          | 0.786            | 0.889            | 0.513            | -10.967            | -35.706         | 13.771         | 0.383          | 0.355          | 0.558          | -5.980             | -16.720  | 4.760  | 0.274          | 0.221          | 0.268          |
| PA at home      | <b>491.941</b>  | <b>307.317</b>   | <b>676.565</b>  | <b>&lt;0.001</b> | <b>&lt;0.001</b> | <b>&lt;0.001</b> | <b>165.643</b>     | <b>38.513</b>   | <b>292.773</b> | <b>0.011</b>   | 0.081          | 0.088          | 6.539              | -55.049  | 68.127 | 0.835          | 0.751          | 0.787          |
| PA at work      | <b>-256.389</b> | <b>-502.304</b>  | <b>-10.473</b>  | <b>0.041</b>     | <b>0.001</b>     | <b>0.002</b>     | <b>154.676</b>     | <b>19.318</b>   | <b>290.033</b> | <b>0.025</b>   | 0.142          | 0.135          | 0.559              | -63.411  | 64.529 | 0.986          | 0.920          | 0.940          |
| Total PA        | <b>-752.616</b> | <b>-1000.376</b> | <b>-504.857</b> | <b>&lt;0.001</b> | <b>&lt;0.001</b> | <b>&lt;0.001</b> | <b>-261.011</b>    | <b>-445.530</b> | <b>-76.492</b> | <b>0.006</b>   | <b>0.004</b>   | <b>0.006</b>   | -79.799            | -166.660 | 7.061  | 0.072          | 0.089          | 0.079          |

CI: confidence interval. PA: physical activity. Reproductive + productive work was used as reference category in all comparisons.

Mean difference and P<sub>1</sub> show the results for unadjusted analysis

P<sub>2</sub>: Analysis adjusted for age, fat percentage, education level, and marital status

P<sub>3</sub>: Analysis adjusted for age, fat percentage, education level, marital status, and disease severity

Supplementary Table 3. Mean difference in sedentary behaviour variables between women with fibromyalgia with a reproductive work only (n=143) and those with a reproductive + productive work (n=115)

|                                          | Mean difference | 95 % CI         | P <sub>1</sub> | P <sub>2</sub> | P <sub>3</sub> |
|------------------------------------------|-----------------|-----------------|----------------|----------------|----------------|
| Total sedentary Time (Monday to Friday ) | -312.514        | -632.988 7.959  | 0.056          | 0.308          | 0.207          |
| Total sedentary Time (Weekend )          | -63.736         | -190.825 63.353 | 0.324          | 0.749          | 0.880          |

CI: confidence interval. Reproductive + productive work was used as reference category in all comparisons.

Mean difference and P<sub>1</sub> show the results for unadjusted analysis

P<sub>2</sub>: Analysis adjusted for age, fat percentage, education level, and marital status

P<sub>3</sub>: Analysis adjusted for age, fat percentage, education level, marital status, and total disease severity
